# Supplementary material
Source: Research Square preprint supplement (doi:10.21203/rs.3.rs-9013677/v1)
Supplement: Supplementary file 1 [file 43189830852b574ac297f16a.docx]

**Appendix B: Med Ed Mini Module Evaluation Survey Questions**

**Please indicate your level of agreement with the following statements:**

| **Agree Item** | **Agree Item Text** |
| --- | --- |
| length | The length of the course was appropriate. |
| pace | The pace of the course was appropriate. |
| workload | The course workload was appropriate. |
| content | The course content was appropriate to my needs. |
| instructor | The course instructor was effective at teaching this content. |
| recommend | I would recommend this module to a colleague. |

| 1 | Strongly disagree |
| --- | --- |
| 2 | Disagree |
| 3 | Neutral |
| 4 | Agree |
| 5 | Strongly Agree |

**Please rate how effective you found the following course components:**

| **Effect Item** | **Effect Text** |
| --- | --- |
| readings | Readings |
| videos | Videos |
| discuss | Discussion Boards |
| synch | Synchronous Meetings |
| assignments | Assignments |

| 1 | Very Ineffective |
| --- | --- |
| 2 | Ineffective |
| 3 | Moderately Effective |
| 4 | Effective |
| 5 | Very Effective |

**Open ended questions:**

How do you plant to use the information you learned in this course?

What was most valuable to you about this course?

Would you change anything about this course?

Do you have any additional comments?
