# Supplementary material
Source: Research Square preprint supplement (doi:10.21203/rs.3.rs-9013677/v1)
Supplement: Supplementary file 2 [file 6527bd798b84d2bc09eca0fd.docx]

**Med Ed Mini-Course Faculty Interest Survey**

The XX at the University of XXis home to degree-granting programs in medical education. We recognize that while enrolling in a formal program may not relevant to or possible for some medical educators, many are eager to participate in faculty development in one or more areas as a way to enhance and further their careers.

As such, the ICRE is developing a series of “Med Ed Mini-Modules” to meet this growing need. Mini-modules will be held in an online format, with both synchronous (“in-person”) meetings and between-meeting assignments and will be led by a master’s trained (or equivalent) medical educator. Each mini-module will be held over 4 weeks with approximately 2 hours of synchronous class-time per week.

To help us focus on developing modules that are most applicable and desirable to our institution’s medical educators, we are requesting that you complete the following survey. Your responses will be anonymous.

There is no obligation to participate in this survey nor in the mini-module program itself. Thank you for your valuable input!

**Do you (or do you wish to) teach medical learners in any capacity, as part of your professional responsibilities?**

- Yes
- No ---STOP (“This concludes the survey for you. Thank you for your time!”)

**Agreement Likert-scale 1-5 (1=strongly disagree, 2=disagree, 3=neutral, 4=agree, 5=strongly agree)**

- Training in medical education is important for developing skills as an educator
- Training in medical education would help me be a better teacher
- Training in medical education would help me achieve scholarship in medical education
- Training in medical education would help me get promoted
- Training in medical education would help me obtain a leadership position
- My division/department supports the careers of medical educators
- I wish I had more faculty development in the field of medical education
- I would be interested in taking online modules on medical education topics

**Which of the following barriers to pursuing faculty development in medical education pertain to you? (check all that apply):**

- I have limited time for faculty development during my normal workday
- I have limited time for faculty development outside of my normal workday
- Current faculty development offerings are held at a time or place that I am unable to attend
- I don’t wish to spend money out of pocket for the training
- I don’t wish to spend money out of my discretionary funds for the training
- The faculty development opportunities that I know about are of poor quality
- I already have the skills I need to be an effective medical educator
- Other (list): _____

**Below is a list of topics that cover a broad range of medical educator competencies. Please rank each medical education topic on how confident you are and how likely you are to seek additional training in it. (Likert-type scale 1-5; 1=strongly disagree, 2=disagree, 3=neutral, 4=agree, 5=strongly agree)**

| Topic | I am confident with my knowledge and skill on this topic | I would like more training on this topic |
| --- | --- | --- |
| **Education Theory**  **--**Adult Learning Theory  --Growth Mindset  --Teaching for Retention |  |  |
| **Teaching skills**  --Giving a good lecture  --Small group teaching methods  --Teaching clinical reasoning  --Online teaching  --Teaching communication skills  --Using simulation as a teaching tool/method  --Being an effective mentor  --Giving effective feedback |  |  |
| **Assessment**  --Grading and evaluation of learners  --Identification and remediation of knowledge deficit  --Identification and remediation of clinical reasoning deficit  --Identification and remediation of professionalism  --Assessing communication skills  --Writing test questions |  |  |
| **Curriculum Development**  -Needs Assessment  --Identifying Goals and Objectives  --Developing Curricular Content  ---Evaluation of Curricula |  |  |
| **Communication**  --Medical Writing (abstracts, manuscripts)  --Effective Presentation Skills  --Poster development and presentation  --Communication with learners from diverse backgrounds |  |  |
| **Leadership**  -Leading teams  -Leading programs |  |  |
| **Scholarship**  --Grant writing  --Survey Design  --Qualitative research methodology  --Quasi-experimental research methodology  --Designing and presenting national workshops and seminars |  |  |
| **Others**  --Understanding the structure and rules of undergraduate medical education  --Understanding the structure and rules of graduate medical education  --Incorporating interpersonal and structural anti-racism in your teaching  --Managing implicit bias and microaggression in the learning environment |  |  |

If we missed medical education topics that you feel are important to include, please list them here: ______

**Demographics**

**Age** (number drop-down)

**Gender** (female, male, non-binary, other, prefer not to answer)

**Academic Rank** (Instructor, Assistant Professor, Associate Professor, Professor, Other, N/A)

**Primary Department** (and Division, if applicable) (drop down menu choice):

- Anesthesiology and Perioperative Medicine
- Biomedical Informatics
- Cardiothoracic Surgery
- Cell Biology
- Computational and Systems Biology
- Critical Care Medicine (if chosen, show drop down menu)
  - Adult Critical Care
  - Pediatric Critical Care
- Dermatology
- Developmental Biology
- Emergency Medicine
- Family Medicine
- Immunology
- Medicine (if chosen, show drop down menu)
  - Cardiology
  - Endocrinology and Metabolism
  - Gastroenterology, Hepatology, and Nutrition
  - General Internal Medicine
  - Geriatric Medicine
  - Hematology/Oncology
  - Infectious Diseases
  - Pulmonary, Allergy, and Critical Care Medicine
  - Renal-Electrolyte
  - Rheumatology and Clinical Immunology
- Microbiology and Molecular Genetics
- Neurobiology
- Neurological Surgery
- Neurology
- Obstetrics, Gynecology and Reproductive Sciences
- Ophthalmology
- Orthopaedic Surgery
- Otolaryngology
- Pathology
- Pediatrics (if chosen, show dropdown menu)
  - Adolescent and Young Adult Medicine
  - Allergy and Immunology
  - Blood and Marrow Transplantation and Cellular Therapies
  - Cardiology
  - Child Advocacy
  - Developmental-Behavioral Pediatrics
  - Emergency Medicine
  - Endocrinology, Diabetes and Metabolism
  - Gastroenterology, Hepatology, and Nutrition
  - General Academic Pediatrics (GAP)
  - Medical Genetics
  - Hematology/Oncology
  - Infectious Diseases
  - Nephrology
  - Neurology
  - Newborn Medicine
  - Paul C. Gaffney Division of Pediatric Hospital Medicine
  - Pulmonary Medicine
  - Rheumatology
- Pharmacology and Chemical Biology
- Physical Medicine and Rehabilitation
- Plastic and Reconstructive Surgery
- Psychiatry
- Radiation Oncology
- Radiology
- Structural Biology
- Surgery (if chosen, show dropdown menu)
  - Pediatric Surgery
  - Plastic and Reconstructive Surgery
  - Surgical Oncology
  - Thoracic Surgery
  - Transplantation Surgery
  - Trauma and General Surgery
  - Vascular Surgery
- Urology

**What prior training in medical education have you received? (check all that apply)**

- Master’s degree in medical education (or equivalent)
- Certificate in medical education (or equivalent)
- Longitudinal faculty development program (ex. Harvard Macy, Stanford, SGIM’s TEACH, AAMC’s MERC)
- Local faculty development seminars (ex: UPSOM Friday 8AM Med Ed faculty development conferences)
- Other (list): ________

**Which medical learners do you teach? (check all that apply)**

- Medical Students
- Residents
- Fellows
- Faculty
- Allied Health Professionals
- Graduate Students
- Other (list): _________

**What leadership roles do you hold (or have you held)? (check all that apply)**

- Program Director
- Associate Program Director
- Assistant Program Director
- Core Clinical Faculty (GME)
- Course Director
- Clerkship Director
- Division Chief
- Associate Chief
- Vice Chair for Education
- Dean’s Office Role
- GME Office Role
- Other (list): _________

**Thank you for your time!** If you would like to be entered into a raffle to receive free tuition for one ICRE med ed mini-module, please click **HERE**: Three winners will be chosen!

(this should take them to a separate field that is not attached to the survey and should collect the person’s name and pitt or upmc email address)
